1 **ELF3 polyQ variation in *Arabidopsis thaliana* reveals PIF4-independent role in**  
2 **thermoreponsive flowering.**

3

4 Maximilian O. Press<sup>1</sup>, Amy Lanctot<sup>2</sup>, Christine Queitsch<sup>1\*</sup>

5 1: University of Washington Department of Genome Sciences

6 2: University of Washington Molecular and Cellular Biology Program, University of

7 Washington Department of Biology

8

9 Keywords: flowering, thermomorphogenesis, ELF3, PIF4, temperature sensing,

10 *Arabidopsis thaliana*, polyglutamine

11

12 \*: correspondence to queitsch@uw.edu

13

14 **Short title: ELF3/PIF4 independence in plant adult thermal responses**

15

16

## 1 **ABSTRACT**

2 Plants have evolved elaborate mechanisms controlling developmental responses to  
3 environmental stimuli. A particularly important stimulus is temperature. Previous work  
4 has identified the interplay of PIF4 and ELF3 as a central circuit underlying thermal  
5 responses in *Arabidopsis thaliana*. However, thermal responses vary widely among  
6 strains, possibly offering mechanistic insights into the wiring of this circuit. ELF3  
7 contains a polyglutamine (polyQ) tract that is crucial for ELF3 function and varies in  
8 length across strains. Here, we use transgenic analysis to test the hypothesis that  
9 natural polyQ variation in ELF3 is associated with the observed natural variation in  
10 thermomorphogenesis. We found little evidence that the polyQ tract plays a specific role  
11 in thermal responses beyond modulating general ELF3 function. Instead, we made the  
12 serendipitous discovery that ELF3 plays a crucial, PIF4-independent role in  
13 thermoresponsive flowering under conditions more likely to reflect field conditions. We  
14 present evidence that ELF3 acts through the photoperiodic pathway, pointing to a  
15 previously unknown symmetry between low and high ambient temperature responses.  
16 Moreover, in analyzing two strain backgrounds with vastly different thermal responses,  
17 we demonstrate that responses may be shifted rather than fundamentally rewired  
18 across strains. Our findings tie together disparate observations into a coherent  
19 framework in which multiple pathways converge in accelerating flowering in response to  
20 temperature, with some such pathways modulated by photoperiod.

21

## 22 **INTRODUCTION**

1 The responses of plants to temperature variation are of central importance to food  
2 security in a changing world [1]. Therefore, the elucidation of the genetic pathways  
3 underlying these responses has been a key mission of plant science [2]. Many previous  
4 studies examined the phenomena of circadian temperature compensation [3–5],  
5 thermoresponsive flowering [6–10], and temperature effects on plant morphology [11–  
6 16]. Several have converged on PIF4 as a master regulator of temperature responses,  
7 and ELF3 as an input to PIF4 integration, among many other genes and pathways [14–  
8 16]. Given known regulatory interactions between ELF3 and PIF4 [17–20], it is  
9 reasonable to predict that both operate in the same pathway for thermal response  
10 phenotypes [21]. Recent reports focusing on one such phenotype, hypocotyl elongation,  
11 support this expectation [14–16].

12 ELF3 serves to repress hypocotyl elongation by reducing PIF4 levels. This  
13 repression of PIF4 occurs at both the transcriptional level, through the role of ELF3 in  
14 the Evening Complex (EC) [17,19], and at the post-translational level, through PIF4  
15 destabilization by phytochrome phyB [22]. Light sensing enforces circadian oscillations  
16 of the EC and other components, leading to calibration of the circadian clock [23,24],  
17 resulting in diurnal repression of hypocotyl elongation through repression of PIF4 and  
18 PIF5 [17,19]. ELF3 also plays a crucial role as a flowering repressor [25]. Consequently,  
19 *elf3* null mutants show elongated hypocotyls even in the light, and flower early.

20 PIF4 is one of a family of basic helix-loop-helix (bHLH) “phytochrome-interacting  
21 factors” (PIFs), transcription factors with overlapping functions promoting  
22 skotomorphogenesis. Under dark conditions, the PIFs act to target phyB for ubiquitin-  
23 mediated degradation by the E3 ubiquitin ligase COP1, thereby repressing

1 photomorphogenesis [26]. Under light conditions, degradation of PIFs is mediated by  
2 direct interactions with photoactivated phyB [22]. PIF4 is distinct from the other PIFs in  
3 having specific roles in temperature sensing and flowering [27]. *pif4* null mutants show  
4 short hypocotyls with photomorphogenic attributes even in the dark [28].

5 At elevated ambient temperatures (27°-29°) the wiring of these signaling  
6 pathways changes. Several independent studies have recently found that elevated  
7 temperatures, specifically during dark periods [29], inhibit the activity of the EC by an  
8 unknown mechanism [14–16], leading to increased expression of *PIF4* and its targets  
9 [11,27]. This increased PIF4 activity leads to several morphological temperature  
10 responses through various signaling pathways [13,27]. PIF4 is also required for the  
11 acceleration of flowering at 27°C under short photoperiods [9,29], though these  
12 observations have been disputed [30,31]. While PIF4 action alone (among PIFs) is  
13 essentially sufficient for most described thermomorphogenic responses [11,27], there is  
14 evidence for a limited role of PIF5 (though not other PIFs) in thermoresponsive  
15 flowering under short days (SDs) [30,31]. In contrast, under continuous light, *pif4* null  
16 mutants have an intact temperature-dependent acceleration of flowering [11]. Lastly,  
17 *pif4* null mutants lose the normal elongation of petioles under high temperatures [11]. It  
18 is unclear why PIF4 does not affect thermoresponsive flowering under continuous light;  
19 yet, this phenomenon may reflect low PIF4 levels under these conditions due to  
20 inhibition by phyB. Under longer photoperiods and higher temperature a flowering  
21 acceleration still exists [7,11], which suggests a PIF4-independent thermoresponsive  
22 flowering pathway. Nonetheless, recent reviews of the literature tend to emphasize the

1 primacy of PIF4 in this response [10,32,33], although the condition of elevated  
2 temperature with short photoperiods is probably rare in the field.

3       Recent studies have identified ELF3 as a plausible upstream regulator of PIF4 in  
4 thermal responses [14–18]. However, others have implicated different candidates, such  
5 as FCA [13], and mathematical modeling has suggested that ELF3/EC complex  
6 regulation alone is insufficient to explain PIF4 thermal regulation [14,34]. The exact  
7 mechanisms of this response have yet to be unraveled.

8       Specifically, the mechanism by which EC/ELF3 activity is reduced under elevated  
9 temperatures (“temperature sensing”) is not known. We recently used transgenic  
10 experiments to demonstrate that ELF3 function is dependent on the unit copy number of  
11 its C-terminal polyglutamine (polyQ) tract [35]. This domain is likely disordered, and  
12 disordered domains evince structural changes in response to physical parameters such  
13 as temperature [36]. Thermal remodeling of this polyQ tract is a plausible mechanism by  
14 which ELF3 activity could be modulated through temperature. This polyQ tract also  
15 shows substantial natural variation [35], potentially serving as a factor underlying natural  
16 variation in thermoresponsive phenotypes. For example, in flies, variable repeats are  
17 associated with local temperature compensation adaptations [37]. In short, the ELF3-  
18 polyQ is an attractive candidate for adaptive variation in the ecologically relevant trait of  
19 temperature response [38].

20       In this study, we used transgenic polyQ variants of ELF3 in two *A. thaliana*  
21 genetic backgrounds to dissect the contribution of the polyQ tract to temperature  
22 response. We show that polyQ repeat copy number modulates temperature sensing by  
23 affecting overall ELF3 function. Surprisingly, we found that ELF3’s role in

1 thermoresponsive flowering appears to be entirely independent of PIF4. We postulate  
2 that ELF3's primary role in thermoresponsive flowering is PIF4-independent and occurs  
3 through the photoperiodic pathway, and that this role is in turn dependent on the genetic  
4 background.

5

## 6 **RESULTS**

7 *The hypocotyl elongation temperature response is modulated by the ELF3 polyQ tract*  
8 *affecting overall gene function.*

9 Many recent studies noted the involvement of ELF3 in temperature-dependent  
10 hypocotyl elongation [14–16,39], concluding that ELF3 protein activity is reduced under  
11 elevated temperatures, thereby relieving ELF3 repression of *PIF4*. *PIF4* up-regulation  
12 then leads to the observed hypocotyl elongation. We examined whether polyQ tract  
13 variation in ELF3 in two backgrounds affects hypocotyl elongation at 27° (Fig. 1). We  
14 previously showed that ELF3 polyQ variation has pleiotropic background-dependent  
15 effects, with nonlinear associations between polyQ tract length and quantitative  
16 phenotypes (including hypocotyl elongation at 22°C; ref. 33). Certain variants (16Q for  
17 Ws, >20Q for Col) generally complemented *elf3* null mutant phenotypes in Col and Ws  
18 *A. thaliana* strains, whereas other variants complemented only specific phenotypes or  
19 behaved as hypomorphs across all tested phenotypes. Here, we observed similar  
20 trends for thermoresponsive hypocotyl elongation (Fig. 1). For example, in the Ws  
21 background (Fig. 1A), the endogenous ELF3 variant (16Q) partially complements the  
22 *elf3* null mutant; another variant (9Q) fully complements the hypocotyl temperature  
23 response. Other polyQ variants behaved as hypomorphs in Ws. In the Col background

1 (Fig. 1B), the endogenous 7Q variant, among other variants, failed to rescue the  
2 response, agreeing with our previous observation that these transgenic lines are  
3 hypomorphic in this background [35]. Deleting the entire polyQ tract eliminated  
4 thermoresponsive hypocotyl elongation in both Col and Ws backgrounds. We next  
5 addressed whether the observed phenotypic variation among polyQ variants was due to  
6 variation in thermosensing or variation in general ELF3 function. We found that robust  
7 thermal responses were strongly correlated with the overall functionality of each ELF3  
8 variant in hypocotyl elongation (Fig. 1C), such that variants with intact thermal  
9 responses exhibited short hypocotyls at 22°C, whereas ELF3 variants with defective  
10 thermal responses exhibited elongated hypocotyls regardless of temperature.  
11 Furthermore, this ELF3 functionality effect is dependent on genetic background  
12 (comparing for instance the 16Q and 20Q responses). Together, these results suggest  
13 that the ELF3 polyQ tract controls repression of hypocotyl elongation regardless of  
14 temperature, rather than sensing temperature specifically. Nonetheless, our transgenic  
15 ELF3 polyQ lines remain informative as an allelic series of ELF3 function to understand  
16 the role of ELF3 in the de-repression of PIF4, which is thought to underlie  
17 thermomorphogenesis [14–16,39–41].

Figure 1

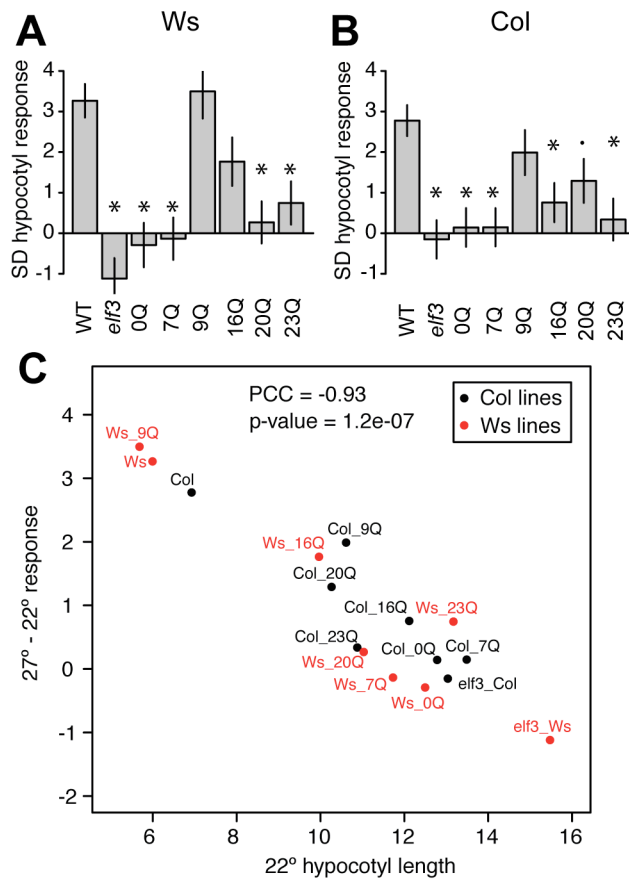

1

2 **Fig. 1.** Response to elevated temperature (27°, relative to 22°) among transgenic lines

3 expressing ELF3-polyQ variants. Mean response and error were estimated by

4 regression, based on two independently-generated transgenic lines for each genotype,

5 with n >= 30 seedlings of each genotype in each condition (Table S1). WT = Ws, *elf3* =

6 *elf3* mutant+vector control, 0Q = *elf3* mutant+*ELF3* transgene lacking polyQ, etc. Error

7 bars indicate standard error of the mean. (A): Ws (Wassilewskija) strain background.

8 Lines are generated in an *elf3-4* background. (B): Response in the Col (Columbia) strain

9 background, lines were generated in an *elf3-200* background. In both (A) and (B), \*\*:

10 Bonferroni-corrected p < 0.01, \*\*: Bonferroni-corrected p < 0.05, . : Bonferroni-corrected

11 p < 0.1 in testing the interaction term (different response from WT, Ws or Col). (C):



1 Temperature response is a function of ELF3 functionality (repression of hypocotyl  
2 elongation at 22°). Simple means of 22° hypocotyl length, regression estimates of  
3 temperature response. PCC = Pearson correlation coefficient; p-value is from a Pearson  
4 correlation test.

#### 6 *Expression of PIF4 and PIF4 targets as a function of temperature and ELF3.*

7 To evaluate the hypothesis that the thermal response defects in the transgenic lines  
8 was due to up-regulation of PIF4 and PIF4 targets, we measured transcript levels of  
9 *PIF4* and its target *AtHB2* in seedlings of selected lines from both backgrounds at 22°C  
10 and 27°C (Fig. S1). Like others [15,16], we observed an inverse relationship between  
11 ELF3 functionality and transcript levels of *PIF4* and *AtHB2*, with larger effects on *PIF4*  
12 expression. The ELF3 lines with the strongest thermal response (e.g. 16Q in the Ws  
13 background) showed the most robust de-repression of *PIF4* at elevated temperature.  
14 However, *elf3* null mutants retained some *PIF4* up-regulation under these conditions,  
15 especially in the Ws background. We conclude that ELF3-mediated de-repression of  
16 PIF4 is involved in thermal responses as suggested by prior studies [15,16]; however,  
17 de-repression of PIF4 and its targets may not be sufficient to explain the entirety of  
18 thermal response defects in *elf3* null mutants.

#### 20 *ELF3 polyQ variation affects thermoresponsive adult morphology and flowering time.*

21 Following the expectation that ELF3's thermal response acts through PIF4, we  
22 reasoned that ELF3 should also play a role in other PIF4-dependent thermal responses.  
23 One well-known response to elevated temperature is adult petiole elongation. *pif4*

1 mutants fail to show this response when grown at elevated temperatures [11]. We  
 2 measured petiole length in the ELF3 polyQ transgenic lines, expecting that, due to  
 3 general PIF4 de-repression, poorly-functioning ELF3 polyQ lines would show no  
 4 response (perhaps due to constitutively elongated petioles, similar to hypocotyls; Fig.  
 5 2). In stark contrast to this expectation, we found that all lines had a robust petiole  
 6 response to temperature (Fig. 2A, B). This effect was apparent in both Ws (Fig. 2A) and  
 7 Col backgrounds (Fig. 2B). Moreover, this response was actually accentuated in *elf3*  
 8 null mutants and in poorly-functioning ELF3 polyQ variants (Fig. 2A, B).

Figure 2

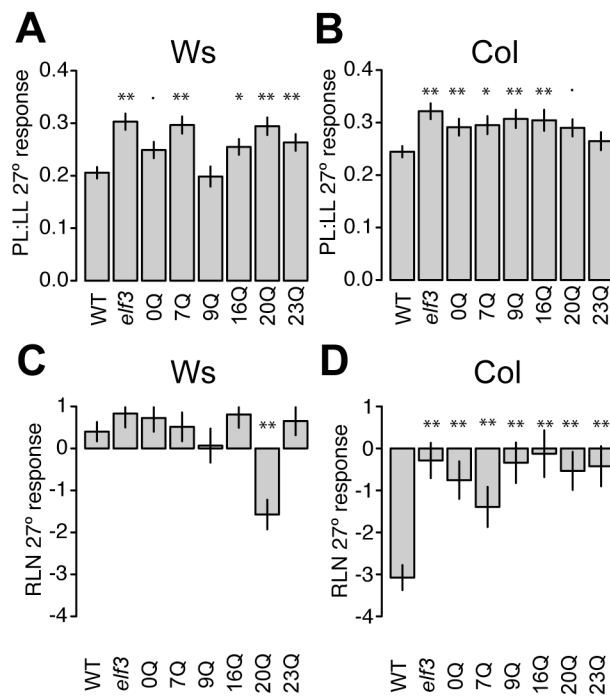

9  
 10 **Fig. 2.** Adult plant responses to elevated temperature (27°, relative to 22°) in long days  
 11 among transgenic lines expressing different ELF3-polyQ variants. (A) and (C):  
 12 Response in the Ws (Wassilewskija) strain background. Lines are in an *elf3-4*  
 13 background. (B) and (D): Response in the Col (Columbia) strain background, lines are

1 in an *elf3-200* background. (A) and (B) display PL:LL temperature response, (C) and (D)  
2 display RLN temperature response. Average responses and errors were estimated in a  
3 regression model accounting for variation between experiments (Table S2), based on  
4 two to three independently-generated transgenic lines for each genotype.  $n \geq 24$  plants  
5 overall for each genotype in each condition. PL:LL = petiole to leaf length ratio at 25  
6 days post germination, RLN = rosette leaf number at flowering, WT = wild type, *elf3* =  
7 *elf3* mutant+vector control, 0Q = *elf3* mutant+*ELF3* transgene with entire polyglutamine  
8 removed, etc. Error bars indicate standard error. In each case, \*\*: Bonferroni-corrected  
9  $p < 0.01$ , \*\*: Bonferroni-corrected  $p < 0.05$ , . : Bonferroni-corrected  $p < 0.1$  in testing the  
10 interaction term (different response from WT, Ws or Col).

11

12 Further, we measured flowering time in transgenic lines as the number of rosette  
13 leaves at flowering (Fig. 2C, D). PIF4 is not required for the accelerated flowering  
14 temperature response under longer photoperiods [11]. Hence, we expected that loss of  
15 ELF3 function should not affect thermoresponsive flowering if ELF3's thermal signaling  
16 role acts through PIF4. In contrast to this expectation, in the Col background, *elf3*  
17 mutants had an abrogated flowering response to elevated temperature (Fig. 2D).  
18 Moreover, most variants in the Col background entirely failed to rescue this phenotype,  
19 and even the endogenous 7Q shows only a partial rescue. While *elf3* mutants show  
20 abrogated flowering response to lower temperatures [8], it was not expected that a  
21 similar role would extend to the elevated temperature flowering response, which is  
22 usually considered to be dominated by PIF4 [9], gibberellin signaling [30], and other  
23 transcriptional regulators of *FT* such as SVP [31].

1            Unlike Col, Ws lacks a robust flowering response to elevated temperature under  
2 these conditions [42], and indeed, variants in the Ws background generally showed no  
3 thermoresponsive flowering (Fig. 2C). Thus, ELF3 polyQ variation does not suffice to  
4 enhance the negligible thermoresponsive flowering in the Ws background under these  
5 conditions. In light of this data, the roles of ELF3 and PIF4 in the elevated temperature  
6 response appear to be independent of one another under these experimental conditions  
7 and for these traits. These results are intriguing, given that the PIF4 pathway is the  
8 best-recognized mechanism for thermoresponsive flowering at high temperatures  
9 [9,10,32,33]. Therefore, we suggest that ELF3 acts in a PIF4-independent pathway for  
10 thermoresponsive flowering at high temperatures.

11

12 *ELF3 regulates thermoresponsive flowering under long days, and is not required for*  
13 *PIF4-dependent adult thermomorphogenesis.*

14 Our results with ELF3-polyQ variants suggested that ELF3 dysfunction does not  
15 meaningfully affect PIF4-dependent traits, but does affect PIF4-independent traits in  
16 adult plants in long days. However, these results may be due to subtle differences in  
17 conditions between our approach and those used by previous investigators. We  
18 therefore directly addressed the relationship of ELF3 and PIF4 in adult  
19 thermoresponsive phenotypes by growing *pif4* and *elf3* mutants with various thermal  
20 treatments. Previous experiments with *pif4* mutants used different conditions from ours,  
21 specifically a later transfer to elevated temperature [11]. Hence, it was possible that the  
22 observed inconsistencies between *elf3* and *pif4* effects on adult thermoresponsive  
23 phenotypes were a trivial consequence of experimental conditions. Specifically, the

1 effects of elevated temperature during the early seedling stages (the conditions we use)  
2 may induce pathways irrelevant to treatments at later, vegetative stages. Thus, we  
3 tested both transfer conditions under long days (Fig. 3). We found that the effect of  
4 different experimental conditions is negligible, though the earlier 27°C treatment showed  
5 a slightly stronger morphological response (Fig. 3A, B). Thus, the timing of the 27°C  
6 treatment (early seedling vs. vegetative stage) does not substantially affect adult  
7 thermoresponsive traits. Further, our results under long days were similar to previous  
8 observations under continuous light [11], showing that PIF4 is essential for petiole  
9 elongation (Fig. 3B), but dispensable for thermoresponsive flowering (Fig. 3C). Our  
10 PIF4 results were in direct contrast to ELF3, which was dispensable for petiole  
11 elongation (Fig. 3B), but essential for thermoresponsive flowering (Fig. 3C). These  
12 results indicate the apparent independence of ELF3 and PIF4 in these specific  
13 responses, and suggest that seedling thermomorphogenesis, adult  
14 thermomorphogenesis, and thermoresponsive flowering constitute three independent  
15 developmental responses.

Figure 3

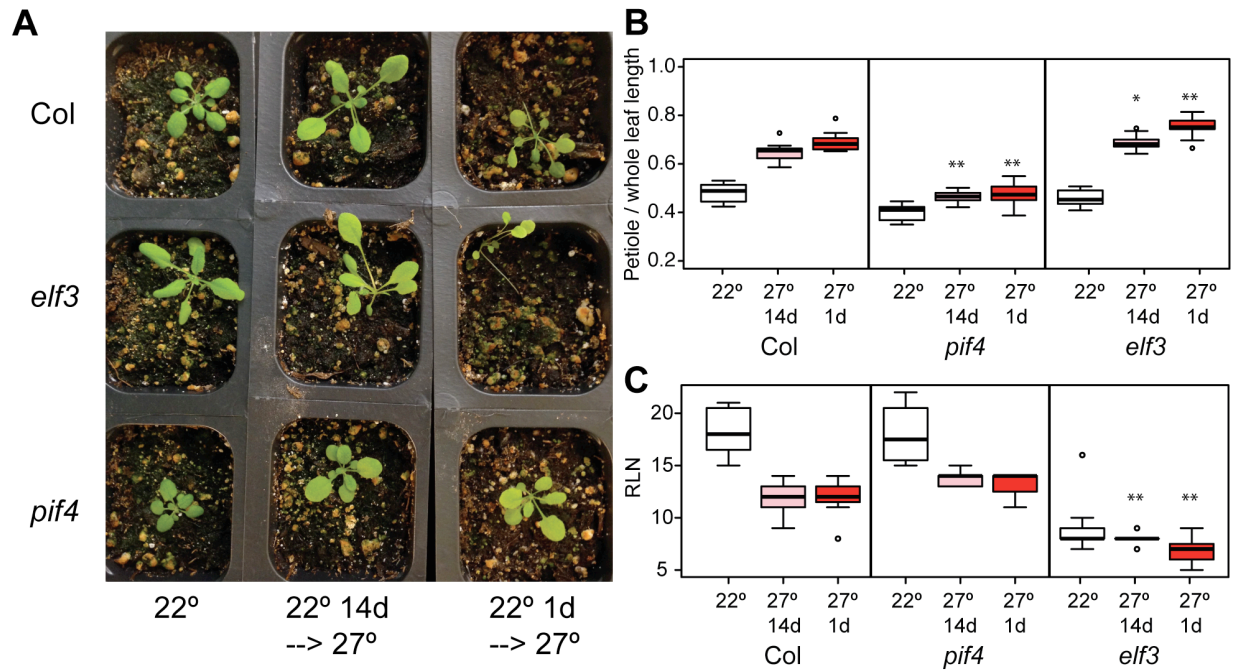

1

2 **Fig. 3.** *elf3* and *pif4* null mutant phenotypes are independent under LD treatments and

3 robust to conditions. (A), (B), and (C): 22°: constant 22° LD growth; 27° 14d: transfer

4 from 22° to 27° at 14 days post-germination; 27° 1d: transfer from 22° to 27° at 1 day

5 post-germination. (A): Col (WT), *elf3-200*, and *pif4-2* plants grown under long days with

6 three different temperature regimes were photographed at 20 days post germination.

7 Experiment was repeated with similar results. (B and D): Petiole elongation responses

8 of the indicated genotypes, measured by ratio of petiole to whole leaf length at 25 days

9 post germination. Regression analysis of data in Table S3. In each case, \*\*: Bonferroni-

10 corrected  $p < 0.01$ , \*\*: Bonferroni-corrected  $p < 0.05$ , . : Bonferroni-corrected  $p < 0.1$  in

11 testing the interaction term (different response from Col).

12

13 One open question was whether the dispensability of ELF3 for petiole elongation

14 reflected increased importance of other inputs to PIF4, such as FCA, which is involved

1 in PIF4-dependent thermoresponsive petiole elongation in 7-day-old seedlings [13]. We  
2 therefore measured adult thermoresponsive petiole elongation in *fca* mutants (Fig.  
3 S2A), and unexpectedly found no substantial difference between *fca* mutants and WT  
4 Col. Regulatory rewiring across development may remove FCA and ELF3 as inputs to  
5 PIF4-dependent thermomorphogenesis in 25-day-old adult plants.

6 A second question was whether loss of *ELF3* function can affect  
7 thermoresponsive flowering in the *Ws* strain under other temperature conditions. We  
8 therefore assayed flowering in *Ws* and the *Ws*-derived null mutant *elf3-4* at 16°C and  
9 22°C (Fig. S2B). Under these conditions, *Ws* robustly accelerated flowering at 22°C,  
10 whereas *elf3-4* showed no perceptible difference in flowering between the two  
11 temperatures. Thus, ELF3's role in thermoresponsive flowering is not restricted to the  
12 Col strain or a certain temperature, but rather is necessary for whatever  
13 thermoresponsive reaction norm a strain may have for flowering.

14

15 *ELF3 and PIF4 regulate adult thermoresponsive phenotypes independently.*

16 If ELF3 and PIF4 were independent in controlling thermal responses of adult  
17 phenotypes under long days, then *elf3 pif4* double mutants would show approximately  
18 additive phenotypes. We generated *elf3 pif4* double mutants and subjected them to the  
19 same experiments as above. Our results indicated that flowering and petiole elongation  
20 constitute independent temperature responses, with ELF3 controlling the former and  
21 PIF4 controlling the latter in additive fashions (Fig. 4). That is, *elf3 pif4* double mutants  
22 showed negligible thermoresponsive flowering like *elf3*, and a negligible petiole  
23 response like *pif4*. Additionally, *elf3 pif4* flowered slightly later than *elf3* at 22°, while

1 maintaining a negligible thermal response in flowering, indicating that *elf3* mutants are  
 2 not simply restricted by a physiological limit of early flowering. The additivity of these  
 3 phenotypes establishes that, under these conditions, ELF3 and PIF4 likely operate in  
 4 separate thermal response pathways.

Figure 4

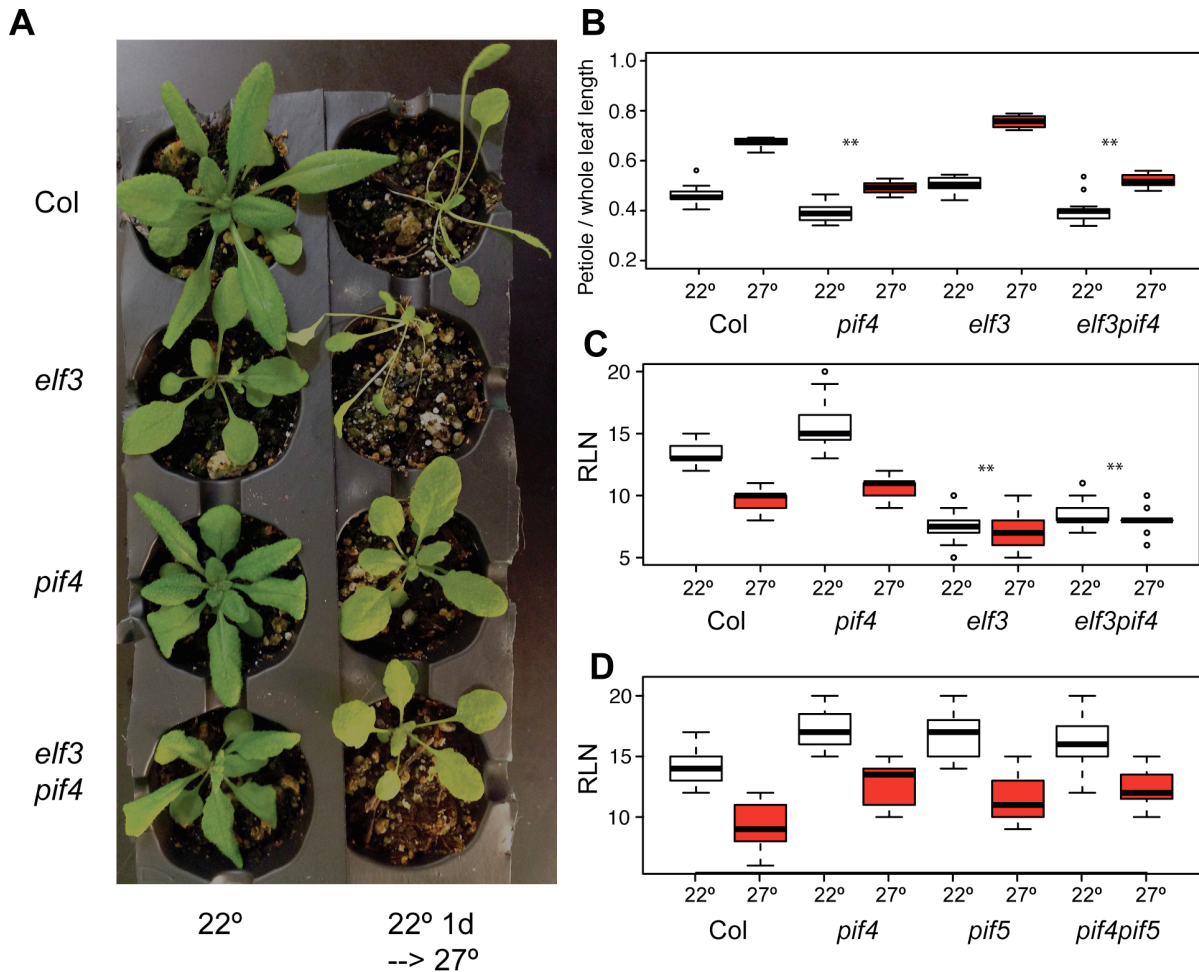

5  
 6 **Fig. 4.** Double mutant analysis confirms PIF4 and ELF3 independence in adult  
 7 temperature responses and non-redundancy of PIF4 with PIF5. (A): Col, *elf3-200*, *pif4-*  
 8 *2*, and *elf3-200 pif4-2* plants grown under long days with two different temperature  
 9 regimes were photographed at 25 days post germination. (B): Petiole elongation  
 10 responses of the indicated genotypes, measured by ratio of petiole to whole leaf length



1 at 25 days post germination. (C): Flowering temperature response of indicated  
2 genotypes, measured by rosette leaf number (RLN) at flowering. (B) and (C):  $n > 8$   
3 plants for each genotype in each treatment. All “27°” plants were seeded and incubated  
4 one day at 22° before transfer to 27°. Experiments were repeated with similar results.  
5 Regression analysis of data reported in Tables S6 and S7. In each case, \*\*: Bonferroni-  
6 corrected  $p < 0.01$ , \*\*: Bonferroni-corrected  $p < 0.05$ , . : Bonferroni-corrected  $p < 0.1$  in  
7 testing the interaction term (different response from Col).

8  
9 Previous studies have indicated that other members of the PIF family have  
10 negligible or minor (in the case of PIF5) roles in these same thermal response  
11 phenotypes [11,27,43]. For instance, under SD, *pif1 pif3 pif4 pif5* mutants behave  
12 essentially identical to *pif4 pif5* mutants in flowering response and *FT* expression, which  
13 in turn show only a very slight abrogation of these responses relative to *pif4* mutants  
14 [31]. *pif4 pif5* double mutants do show slightly abrogated thermoresponsive flowering  
15 under 12 hour light : 12 hour dark photoperiods relative to single mutants [29], similar to  
16 other thermally responsive phenotypes [11,29–31]. These previous findings, combined  
17 with the completely intact flowering response of *pif4* mutants, suggest that redundancy  
18 between PIFs plays little meaningful role in this response. However, to directly address  
19 this possibility, we evaluated thermoresponsive flowering in *pif5* and *pif4 pif5* mutants  
20 (Fig. 4D), because PIF5 is most often considered to act redundantly with PIF4  
21 [20,29,31,44], and the only other PIF to show any small contribution to  
22 thermoresponsive flowering [29–31]. As expected, both *pif5* single mutants and *pif4 pif5*  
23 double mutants demonstrate intact thermoresponsive flowering. These observations

1 indicate that redundancy with other PIFs is not responsible for the apparent  
2 independence of PIF4 and ELF3. Notably, petiole elongation at elevated temperatures  
3 is equally disrupted in *pif4* and *pif4 pif5* mutants, but intact in *pif5* single mutants (Figure  
4 S3), reproducing the known dependence of this trait upon PIF4 alone [11].  
5 Consequently, our results support the previously-suggested dominance of  
6 thermomorphogenesis by PIF4 rather than other PIFs, and the irrelevance of PIF4 (and  
7 most likely other PIFs as well) to thermoresponsive flowering under LD.

8 Overall, the strong photoperiod-dependence of PIF4-related thermoresponsive  
9 flowering necessitates the existence of some pathway or pathways independent of PIF4  
10 under long days, given the persistence of the phenomenon under these conditions.  
11 Based on our data, ELF3 acts in one such pathway.

12

13 *Thermoresponsive flowering under long days can operate through the photoperiodic*  
14 *pathway.*

15 ELF3 operates in thermoresponsive flowering at low ambient temperatures via the  
16 photoperiodic pathway, through repressing *GI* expression, after which *GI* in turn directly  
17 activates FT [45,46]. To evaluate whether this pathway might explain our results, we  
18 measured transcript levels of *GI* and *CO* in wild-type and *elf3* mutants under 22°C and  
19 27°C (Fig. 5A). We found that *GI* is strongly up-regulated in *elf3* null mutants of Col and  
20 Ws backgrounds, confirming previous reports in Col [39,46]. Further, wild-type Ws  
21 showed higher basal *GI* levels compared to Col, which did not increase at higher  
22 temperatures. In contrast, Col showed very low basal *GI* levels that increased at higher  
23 temperatures to approximately the same levels as Ws. *CO* levels, however, were not

1 substantially increased by either *elf3* mutation or increased temperature, consistent with  
2 previous reports [8,46]. Thus, robust thermoresponsive flowering was correlated with  
3 low basal levels of *Gf*, and with temperature-dependent *Gf* up-regulation, as observed in  
4 Col. The ELF3-dependent thermal responsiveness of *Gf* expression confirms previous  
5 reports [15], though the among-strain variation in responsiveness appears to be novel  
6 and correlated specifically with flowering induction (but not hypocotyl or petiole  
7 elongation, Figures 1 and 2). High basal *Gf* levels in *Ws* may be associated with other  
8 thermoresponsive deficiencies at high temperatures in this strain [42,47,48]. These  
9 observations support the model under which ELF3 acts in the photoperiodic pathway to  
10 engender thermoresponsive flowering, just as it does in response to lower ambient  
11 temperatures [8,46].

12 We attempted to measure *FT* transcript levels in these samples, expecting that  
13 they would be elevated in the early-flowering *elf3* and 27°C conditions (Figure S4).  
14 Unexpectedly, we observed that, while *FT* levels may increase slightly in the *elf3*  
15 mutants, *FT* appears dramatically down-regulated in all 27°C samples. This finding is  
16 difficult to interpret in light of the phenotypic data, as most models of thermoresponsive  
17 flowering agree that signaling operates through *FT* [7–9,29–31], suggesting rather that  
18 these 7-day-old seedlings may be too young to measure physiologically relevant *FT*  
19 expression, at least under 27°C conditions.

Figure 5

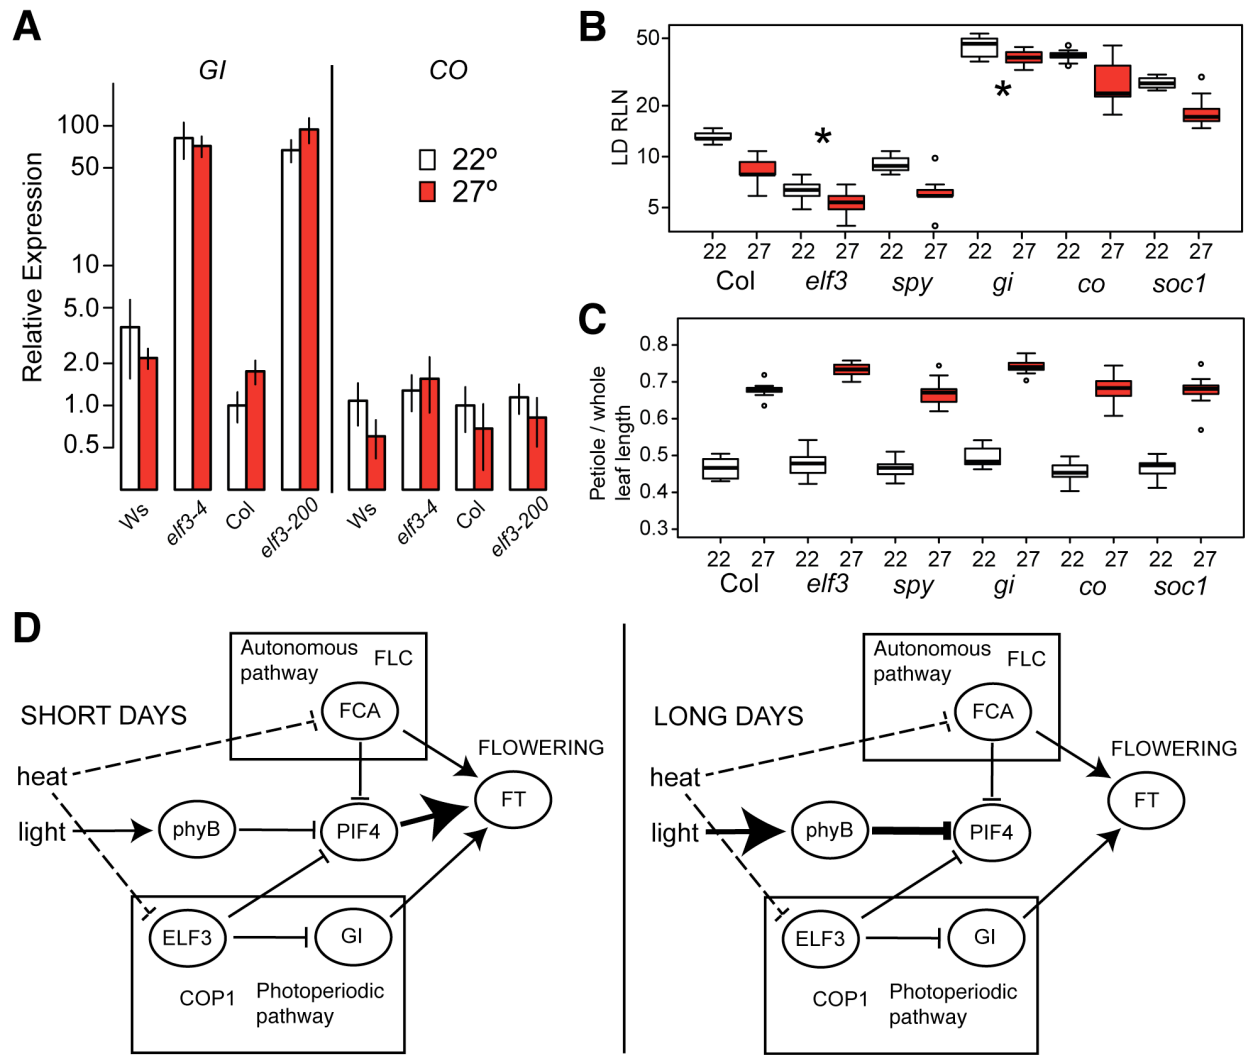

1

2 **Fig. 5.** ELF3 and GI regulate thermoresponsive flowering. (A): Temperature-responsive  
 3 expression of photoperiodic pathway components at ZT0. Expression of each gene is  
 4 quantified relative to levels in Col at 22° (Col 22 = 1.0). Error bars represent SEM  
 5 across three biological replicates. *elf3-4*: *elf3* null in Ws background; *elf3-200*: *elf3* null  
 6 in Col background. (B): Thermoresponsive flowering in various flowering mutants. LD  
 7 RLN = rosette leaf number at flowering under long days. \* : interaction term for  
 8 genotype by environment at Bonferroni-corrected  $p < 0.05$ ; details of regression model

1 in Table S9. (C) Thermoresponsive petiole elongation in various flowering mutants. For  
2 (B) and (C),  $n \geq 8$  plants of each genotype in each condition; white boxes indicate  
3 measurements at 22°, red boxes indicate measurements at 27°. *gi*: *gi-2*, *co*: *co-101*,  
4 *spy*: *spy-3*, *soc1*: *soc1* T-DNA insertion, *elf3*: *elf3-200*. This experiment was repeated  
5 with similar results. (D): Models of thermoresponsive flowering under long and short  
6 photoperiods. Dashed edges indicate speculated temperature sensing mechanisms.  
7 Edges with increased weight indicate relative increases of influence between conditions.  
8 Pathways are indicated, along with other important actors reported elsewhere.

9  
10 If the photoperiodic pathway contributes to thermoresponsive flowering at  
11 elevated ambient temperatures in long days (LD), we would expect mutants in this  
12 pathway to show abrogated thermal responses, as they do under short days (SD), along  
13 with members of the autonomous pathway [7]. These two pathways also contribute  
14 independently to thermoresponsive flowering at low temperatures (16°C vs. 23°C) [6,8].  
15 Altogether, we would expect that a photoperiodic thermoresponsive flowering pathway  
16 would operate independently of both PIF4 and the autonomous pathways in long days.  
17 It is not clear whether the autonomous pathway would be independent of PIF4, given  
18 known interactions between FCA and PIF4 [13].

19 To evaluate whether these past results under other conditions also apply to long  
20 days and elevated temperatures, we measured flowering time at 22°C and 27°C in  
21 mutants in the photoperiodic pathway (*gi*, *co*, Fig. 5B). We also tested mutants of the  
22 gibberellin pathway (*spy*), and a terminal floral integrator (*soc1*), which we do not expect  
23 to be necessary for thermoresponsive flowering. We found robust thermal responses in

1 all mutants except *elf3* and *gi*, similar to previous results under different conditions  
2 [7,8,45,46]. These results emphasize once again that differences in thermoresponsive  
3 flowering are not generalizable between photoperiods, as it has recently been shown  
4 that *co* mutants have a partial flowering acceleration defect under SD. These results  
5 implicate GI (but not CO) as an actor in thermoresponsive flowering at elevated  
6 temperatures. Collectively, these experiments suggest that the photoperiod pathway is  
7 necessary in promoting thermoresponsive flowering in long days, and expression data  
8 in this and other studies suggests that ELF3 is likely to act within this pathway.

9

## 10 **DISCUSSION**

11 ELF3 and PIF4 are both crucial integrators of temperature and light signaling in  
12 controlling *A. thaliana* development. Recent literature has emphasized the centrality of  
13 PIF4-dependent thermoresponsive regulation in a variety of phenotypes, including in  
14 flowering [9,10,32]. Here, we show that PIF4 is dispensable for thermoresponsive  
15 flowering under long photoperiod conditions [11], and that ELF3 is essential for  
16 thermoresponsive flowering under these conditions. Our results integrate previous  
17 knowledge about thermoresponsive flowering, and identify at least one pathway for this  
18 response that does not involve PIF4. Moreover, we show that while polyQ variation in  
19 ELF3 affects ELF3 function, the polyQ tract is unlikely a temperature-responsive  
20 component in itself. Our results allow us to integrate the many disparate findings of  
21 current studies into classic models of thermal responses in *A. thaliana*, allowing a  
22 comprehensive view of the genetic underpinnings of this agronomically crucial plant  
23 trait.

1

2 *ELF3 polyglutamine variation appears to affect thermoresponsive traits by modulating*  
3 *overall ELF3 activity.*

4 In previous work, we demonstrated that polyQ variation in ELF3 is (i) common, (ii)  
5 affects many known ELF3-dependent phenotypes, and (iii) is dependent on the genetic  
6 background [35]. Following the recent discoveries that ELF3 is involved with thermal  
7 response [14–16], we confirmed that ELF3 polyQ variation also affects thermal  
8 response phenotypes in a background-dependent fashion. However, we found little  
9 support for the hypothesis that the polyQ tract has a special role in temperature  
10 sensing. Instead, as was the case for other ELF3-dependent phenotypes, ELF3 polyQ  
11 variation appeared to affect overall ELF3 functionality, with less functional ELF3 variants  
12 lacking robust temperature responses. However, a more exhaustive series of polyQ  
13 variants may be required for revealing polyQ-specific effects, in particular because the  
14 molecular mechanism(s) by which polyQ variation affects ELF3 functionality remain  
15 unknown.

16

17 *ELF3-PIF4 relationship in thermomorphogenesis.*

18 One question that remains unanswered is to what extent ELF3 participates in PIF4-  
19 dependent thermoresponsive morphologies. While our study and previous work  
20 [14,16,39] support a PIF4-ELF3 link in thermoresponsive hypocotyl elongation, this  
21 relationship disappears in the analogous case of thermoresponsive petiole elongation.  
22 These results can be explained by many hypotheses. For instance, it is possible that  
23 ELF3 regulation of PIF4 is only relevant at the early seedling stage. Another possible

1 hypothesis is that ELF3 regulation of PIF4 in some instances is sufficient but not  
2 necessary for thermal responses. More studies are needed to understand the  
3 mechanistic details of the ELF3 and PIF4 relationship in thermomorphogenesis.

4

5 *Natural variation in temperature response.*

6 Several studies have found that different *A. thaliana* strains respond to temperature  
7 differently, either shifting or inverting the reaction norm of the phenotype in question  
8 [42,47,48]. Ws has a shifted reaction norm with respect to temperature compared to Col  
9 for photoperiod-related phenotypes, including flowering. For instance, Ws displays  
10 accelerated flowering at 23°C vs. 16°C [42], but accelerates flowering no further at  
11 27°C. Here, we show that this acceleration requires ELF3, like the elevated temperature  
12 acceleration in Col. Another example of differential mutational effects among strains is  
13 that *gi* mutants in the Ler background display robust thermoresponsive flowering [6,7]. It  
14 is unclear whether this finding is due to altered wiring of pathways between these  
15 backgrounds.

16

17 *Thermoresponsive flowering requires either PIF4 or ELF3, depending on photoperiod.*

18 Under various conditions, both ELF3 and PIF4 have been found to be crucial for  
19 thermoresponsive flowering. Other members of the autonomous and the photoperiodic  
20 pathways have also been implicated in thermoresponsive flowering [6–8] (besides other  
21 pathways, [49]). Consequently, some combination of these pathways, modulated by  
22 experimental conditions, must require ELF3 and/or PIF4. We and others [11,29] have  
23 observed that PIF4 and its paralogs are not required for proper thermoresponsive



1 flowering under longer photoperiods. Furthermore, we and others [8,46] have shown  
2 that ELF3 and the photoperiod pathway (excluding CO) are essential for proper  
3 thermoresponsive flowering under long days. It has been previously shown that PIF4  
4 and the photoperiodic pathway contribute to thermoresponsive flowering via  
5 independent pathways [9], suggesting that under longer photoperiods PIF4 activity is  
6 inhibited, allowing other mechanisms to dominate thermoresponsive flowering.

7         We propose a model of thermoresponsive flowering, in which PIF4, ELF3, the  
8 photoperiodic pathway, and other pathways interact depending upon condition and  
9 genetic background (Fig. 5D). Under short days or other short photoperiods, phyB  
10 activity is down-regulated, leading to up-regulation of PIF4 [22,50–52], which at high  
11 levels occupies the promoter of the flowering integrator *FT* and induces flowering [9].  
12 However, under longer photoperiods, phyB up-regulation leads to an attenuation of  
13 PIF4 activity, and consequently the role of PIF4 and other PIFs becomes negligible [11].  
14 This allows canonical ambient temperature responses (such as the photoperiodic  
15 pathway, including ELF3, [8,46]) to take a dominant role in thermoresponsive flowering.  
16 Constitutive overexpression of PIF4, PIF5, and PIF3 under long day conditions induces  
17 early flowering [30], supporting the hypothesis that differences in PIF levels underlie the  
18 photoperiod-dependence of PIF4's role. We have not formally excluded the possibility  
19 that members of the large PIF family other than PIF4 and PIF5 might contribute to the  
20 phenotype; however, there is no evidence at present to suggest that they might  
21 [11,27,30,31]. Several reports have indicated that GI and COP1, but not CO, are  
22 involved in thermoresponsive flowering [7,8,46], with GI directly binding the *FT* promoter  
23 [46]. Under each of these conditions, *FT*-induced flowering is activated by a different

1 signaling cascade. This interpretation leads to a coherent view of how light and  
2 temperature responses are integrated in this important plant trait.

3 To summarize, at least three independent mechanisms have been described that  
4 promote thermoresponsive flowering in any context. These include the photoperiodic  
5 pathway (PHYB/ELF3/GI/COP1), the autonomous pathway  
6 (PHYA/FCA/FVE/TFL1/FLC), and the PIF4-dependent pathway  
7 (PIF4/H2A.Z/gibberellin), all of which converge by regulating *FT* (although the last  
8 pathway may also act through other integrators [29,30]). Our results showing a down-  
9 regulation of *FT* at elevated temperatures in young seedlings may also hold clues  
10 regarding the interaction of these pathways, but are difficult to interpret in the context of  
11 the other evidence. The collective results of our experiments and previous work suggest  
12 that the first two pathways are necessary but not sufficient for thermoresponsive  
13 flowering, and that the third (PIF4) is sufficient but not necessary for thermoresponsive  
14 flowering. Further study will be necessary in understanding the interdependencies of the  
15 three pathways. For instance, it has been suggested that PIF4 binding to the *FT*  
16 promoter is dependent on cooperativity with a second photoperiod-controlled actor [34].

17 In conclusion, we observe that ELF3 is involved in the hypocotyl response to  
18 elevated temperature as reported previously, and that this response can be abrogated  
19 by poorly-functioning ELF3 polyQ variants. We further demonstrate that ELF3 has little  
20 effect on the petiole temperature response, and is necessary for the flowering  
21 temperature response, suggesting that it functions independently of PIF4, potentially in  
22 the photoperiodic pathway. These results reiterate the complexity of these crucial  
23 environmental responses in plants, and can serve as a basis for further development of

1 our understanding of how plants respond to elevated temperatures. In the context of  
2 climatic changes, this understanding will serve those attempting to secure the global  
3 food supply.

4

## 5 **MATERIALS AND METHODS**

6 *Plant materials and growth conditions.* All mutant lines (except *pif4-2 elf3-200*) were  
7 either described previously or obtained as T-DNA insertions from the Arabidopsis  
8 Biological Resources Center at Ohio State University [53,54], and are described in  
9 Table S11. *pif4-2 elf3-200* was obtained via crossing and genotyping. T-DNA insertions  
10 were confirmed with primers described in Table S10. For hypocotyl assays, seedlings  
11 were grown for 15d in incubators set to SD (8h light : 16h dark days, with light supplied  
12 at  $100 \mu\text{mol} \cdot \text{m}^{-2} \cdot \text{s}^{-1}$  by cool white fluorescent bulbs) on vertical plates as described  
13 previously [35]. All plates were incubated at  $22^{\circ}$  for one day, after which one replicate  
14 arm was transferred to an incubator set to  $27^{\circ}$ , with another replicate arm maintained at  
15  $22^{\circ}$ . For flowering time assays, plants were stratified 3-5d at  $4^{\circ}$  in 0.1% agarose and  
16 seeded into Sunshine #4 soil in 36-pot or 72-pot flats to germinate at  $22^{\circ}$  under LD (16h  
17 light : 8 hr dark days, with light supplied at  $100 \mu\text{mol} \cdot \text{m}^{-2} \cdot \text{s}^{-1}$  by cool white fluorescent  
18 bulbs). Replicate arms were subsequently transferred to  $27^{\circ}$  LD conditions as indicated,  
19 with others remaining at  $22^{\circ}$ . Different temperature treatments of the same experiment  
20 were identical with respect to randomization, setup, and format. At 25d, petiole length  
21 and whole leaf length (including petiole) of the third leaf were measured, and the ratio of  
22 these values was further analyzed. Flowering was defined as an inflorescence  $\geq 1\text{cm}$   
23 tall; at this point, date and rosette leaf number were recorded.

24

25 *Trait data analysis.* All data analysis was performed using R v3.2.1 [55]. Where  
26 indicated, temperature responses were modeled using multiple regression in the form  
27  $Phenotype \sim \mu + \beta_G Genotype + \beta_T Temperature + \beta_{G \times T}(Genotype \times Temperature) +$   
28  $\beta_E Experiment + Error$ . All experiments were included in models for transgenic  
29 experiments, and thus the  $\beta_E$  term describes systematic variation between experiments,

1 whereas line-specific effects among transgenics should be modeled in the error term.  
2 Where temperature responses are reported, they consist of the  $\beta_T + \beta_{G \times T}$  terms and  
3 associated errors ( $\sqrt{\sigma_T^2 + \sigma_{G \times T}^2}$ ) where  $\sigma_T$  is the standard error for  $\beta_T$  and  $\sigma_{G \times T}$  is the  
4 standard error for  $\beta_{G \times T}$ , and thus are corrected for systematic experimental variation  
5 and temperature-independent genotype effects. Where p-values are reported for GxT  
6 interaction effects, they have been subjected to a Bonferroni correction to adjust for  
7 multiple comparisons. Analysis scripts and data are provided at  
8 [https://figshare.com/articles/elf3\\_pif4\\_data\\_code\\_v2/3398353](https://figshare.com/articles/elf3_pif4_data_code_v2/3398353).

9  
10

11 *Gene expression analyses.* Seedlings were grown for 1d under LD at 22°, after which  
12 one replicate arm was transferred to LD at 27°, with another replicate arm remaining at  
13 22°, and all seedlings were harvested 6d later at indicated times. At harvest, ~30mg  
14 aerial tissue of pooled seedlings was flash-frozen immediately in liquid nitrogen and  
15 stored at -80°. RNA extraction, cDNA synthesis, and real-time quantitative PCR were  
16 performed as described previously [35], using primers in Table S10. Transcript levels  
17 were quantified from technical triplicate across at least two biological replicates using  
18 the  $\Delta\Delta C_t$  method, assuming 100% primer efficiency [56].

19

## 20 **ACKNOWLEDGMENTS**

21 We thank Philip Wigge and Jaehoon Jung for ideas, helpful conversations, sharing  
22 unpublished data, and comments on this manuscript. We thank Evan Eichler for use of  
23 the LightCycler instrument. We thank members of the Queitsch lab for helpful  
24 discussions. This work was supported by National Institutes of Health New Innovator  
25 Award DP2OD008371 to CQ.

26

## 27 **REFERENCES**

- 1 1. Battisti DS, Naylor RL (2009) Historical warnings of future food insecurity with  
2 unprecedented seasonal heat. *Science* 323: 240–244.  
3 doi:10.1126/science.1164363.
- 4 2. Quint M, Delker C, Franklin KA, Wigge PA, Halliday KJ, et al. (2016) Molecular  
5 and genetic control of plant thermomorphogenesis. *Nat Plants* 2: 15190.  
6 doi:10.1038/nplants.2015.190.
- 7 3. Gould PD, Locke JCW, Larue C, Southern MM, Davis SJ, et al. (2006) The  
8 molecular basis of temperature compensation in the *Arabidopsis* circadian clock.  
9 *Plant Cell* 18: 1177–1187. doi:10.1105/tpc.105.039990.
- 10 4. Edwards KD, Anderson PE, Hall A, Salathia NS, Locke JCW, et al. (2006)  
11 FLOWERING LOCUS C mediates natural variation in the high-temperature  
12 response of the *Arabidopsis* circadian clock. *Plant Cell* 18: 639–650.  
13 doi:10.1105/tpc.105.038315.
- 14 5. Thines B, Harmon FG (2010) Ambient temperature response establishes ELF3 as  
15 a required component of the core *Arabidopsis* circadian clock. *Proc Natl Acad Sci*  
16 *U S A* 107: 3257–3262. doi:10.1073/pnas.0911006107.
- 17 6. Blázquez MA, Ahn JH, Weigel D (2003) A thermosensory pathway controlling  
18 flowering time in *Arabidopsis thaliana*. *Nat Genet* 33: 168–171.  
19 doi:10.1038/ng1085.
- 20 7. Balasubramanian S, Sureshkumar S, Lempe J, Weigel D (2006) Potent induction  
21 of *Arabidopsis thaliana* flowering by elevated growth temperature. *PLoS Genet* 2:  
22 e106. doi:10.1371/journal.pgen.0020106.
- 23 8. Strasser B, Alvarez MJ, Califano A, Cerdán PD (2009) A complementary role for  
24 ELF3 and TFL1 in the regulation of flowering time by ambient temperature. *Plant*  
25 *J* 58: 629–640. doi:10.1111/j.1365-313X.2009.03811.x.
- 26 9. Kumar SV, Lucyshyn D, Jaeger KE, Alós E, Alvey E, et al. (2012) Transcription  
27 factor PIF4 controls the thermosensory activation of flowering. *Nature* 484: 242–  
28 245. doi:10.1038/nature10928.
- 29 10. Song YH, Ito S, Imaizumi T (2013) Flowering time regulation: photoperiod- and  
30 temperature-sensing in leaves. *Trends Plant Sci* 18: 575–583.  
31 doi:10.1016/j.tplants.2013.05.003.
- 32 11. Koini MA, Alvey L, Allen T, Tilley CA, Harberd NP, et al. (2009) High temperature-  
33 mediated adaptations in plant architecture require the bHLH transcription factor  
34 PIF4. *Curr Biol* 19: 408–413. doi:10.1016/j.cub.2009.01.046.

- 1 12. Johansson H, Jones HJ, Foreman J, Hemsted JR, Stewart K, et al. (2014)  
2 Arabidopsis cell expansion is controlled by a photothermal switch. *Nat Commun*  
3 5: 4848. doi:10.1038/ncomms5848.
- 4 13. Lee H-J, Jung J-H, Cortés Llorca L, Kim S-G, Lee S, et al. (2014) FCA mediates  
5 thermal adaptation of stem growth by attenuating auxin action in Arabidopsis. *Nat*  
6 *Commun* 5: 5473. doi:10.1038/ncomms6473.
- 7 14. Box MS, Huang BE, Domijan M, Jaeger KE, Khattak AK, et al. (2014) ELF3  
8 Controls Thermoresponsive Growth in Arabidopsis. *Curr Biol* 25: 194–199.  
9 doi:10.1016/j.cub.2014.10.076.
- 10 15. Mizuno T, Nomoto Y, Oka H, Kitayama M, Takeuchi A, et al. (2014) Ambient  
11 temperature signal feeds into the circadian clock transcriptional circuitry through  
12 the EC night-time repressor in Arabidopsis thaliana. *Plant Cell Physiol* 55: 958–  
13 976. doi:10.1093/pcp/pcu030.
- 14 16. Raschke A, Ibañez C, Ullrich KK, Anwer MU, Becker S, et al. (2015) Natural  
15 variants of ELF3 affect thermomorphogenesis by transcriptionally modulating  
16 PIF4-dependent auxin response genes. *BMC Plant Biol* 15: 197.  
17 doi:10.1186/s12870-015-0566-6.
- 18 17. Nusinow DA, Helfer A, Hamilton EE, King JJ, Imaizumi T, et al. (2011) The ELF4-  
19 ELF3-LUX complex links the circadian clock to diurnal control of hypocotyl growth.  
20 *Nature* 475: 398–402. doi:10.1038/nature10182.
- 21 18. Nieto C, López-Salmerón V, Davière J-M, Prat S (2014) ELF3-PIF4 Interaction  
22 Regulates Plant Growth Independently of the Evening Complex. *Curr Biol* 25:  
23 187–193. doi:10.1016/j.cub.2014.10.070.
- 24 19. Nozue K, Covington MF, Duek PD, Lorrain S, Fankhauser C, et al. (2007)  
25 Rhythmic growth explained by coincidence between internal and external cues.  
26 *Nature* 448: 358–361. doi:10.1038/nature05946.
- 27 20. Filo J, Wu A, Eliason E, Richardson T, Thines BC, et al. (2015) Gibberellin driven  
28 growth in *elf3* mutants requires PIF4 and PIF5. *Plant Signal Behav.*  
29 doi:10.4161/15592324.2014.992707.
- 30 21. Lorenzo CD, Sanchez-Lamas M, Antonietti MS, Cerdán PD (2016) Emerging  
31 Hubs in Plant Light and Temperature Signaling. *Photochem Photobiol* 92: 3–13.  
32 doi:10.1111/php.12535.
- 33 22. Lorrain S, Allen T, Duek PD, Whitelam GC, Fankhauser C (2008) Phytochrome-  
34 mediated inhibition of shade avoidance involves degradation of growth-promoting  
35 bHLH transcription factors. *Plant J* 53: 312–323. doi:10.1111/j.1365-  
36 313X.2007.03341.x.

- 1 23. McWatters HG, Bastow RM, Hall A, Millar AJ (2000) The ELF3 zeitnehmer  
2 regulates light signalling to the circadian clock. *Nature* 408: 716–720.  
3 doi:10.1038/35047079.
- 4 24. Covington MF, Panda S, Liu XL, Strayer CA, Wagner DR, et al. (2001) ELF3  
5 modulates resetting of the circadian clock in *Arabidopsis*. *Plant Cell* 13: 1305–  
6 1315.
- 7 25. Zagotta MT, Hicks KA, Jacobs CI, Young JC, Hangarter RP, et al. (1996) The  
8 *Arabidopsis* ELF3 gene regulates vegetative photomorphogenesis and the  
9 photoperiodic induction of flowering. *Plant J* 10: 691–702. doi:10.1046/j.1365-  
10 313X.1996.10040691.x.
- 11 26. Leivar P, Quail PH (2011) PIFs: pivotal components in a cellular signaling hub.  
12 *Trends Plant Sci* 16: 19–28. doi:10.1016/j.tplants.2010.08.003.
- 13 27. Proveniers MCG, van Zanten M (2013) High temperature acclimation through  
14 PIF4 signaling. *Trends Plant Sci* 18: 59–64. doi:10.1016/j.tplants.2012.09.002.
- 15 28. Bai M-Y, Shang J-X, Oh E, Fan M, Bai Y, et al. (2012) Brassinosteroid, gibberellin  
16 and phytochrome impinge on a common transcription module in *Arabidopsis*. *Nat*  
17 *Cell Biol* 14: 810–817. doi:10.1038/ncb2546.
- 18 29. Thines BC, Youn Y, Duarte MI, Harmon FG (2014) The time of day effects of  
19 warm temperature on flowering time involve PIF4 and PIF5. *J Exp Bot* 65: 1141–  
20 1151. doi:10.1093/jxb/ert487.
- 21 30. Galvão VC, Collani S, Horrer D, Schmid M (2015) Gibberellic acid signaling is  
22 required for ambient temperature-mediated induction of flowering in *Arabidopsis*  
23 *thaliana*. *Plant J* 84: 949–962. doi:10.1111/tpj.13051.
- 24 31. Fernández V, Takahashi Y, LeGourrierc J, Coupland G (2016) Photoperiodic  
25 and thermosensory pathways interact through CONSTANS to promote flowering  
26 at high temperature under short days. *Plant J*. doi:10.1111/tpj.13183.
- 27 32. Wigge PA (2013) Ambient temperature signalling in plants. *Curr Opin Plant Biol*  
28 16: 661–666. doi:10.1016/j.pbi.2013.08.004.
- 29 33. Liu J, Feng L, Li J, He Z (2015) Genetic and epigenetic control of plant heat  
30 responses. *Front Plant Sci* 06. doi:10.3389/fpls.2015.00267.
- 31 34. Seaton DD, Smith RW, Song YH, MacGregor DR, Stewart K, et al. (2015) Linked  
32 circadian outputs control elongation growth and flowering in response to  
33 photoperiod and temperature. *Mol Syst Biol* 11: 776.  
34 doi:10.15252/msb.20145766.

- 1 35. Undurraga SF, Press MO, Legendre M, Bujdoso N, Bale J, et al. (2012)  
2 Background-dependent effects of polyglutamine variation in the Arabidopsis  
3 thaliana gene ELF3. Proc Natl Acad Sci U S A 109: 19363–19367.  
4 doi:10.1073/pnas.1211021109.
- 5 36. Uversky VN (2009) Intrinsically disordered proteins and their environment: effects  
6 of strong denaturants, temperature, pH, counter ions, membranes, binding  
7 partners, osmolytes, and macromolecular crowding. Protein J 28: 305–325.  
8 doi:10.1007/s10930-009-9201-4.
- 9 37. Sawyer LA (1997) Natural Variation in a Drosophila Clock Gene and Temperature  
10 Compensation. Science (80- ) 278: 2117–2120.  
11 doi:10.1126/science.278.5346.2117.
- 12 38. Gemayel R, Vincens MD, Legendre M, Verstrepen KJ (2010) Variable tandem  
13 repeats accelerate evolution of coding and regulatory sequences. Annu Rev  
14 Genet 44: 445–477. doi:10.1146/annurev-genet-072610-155046.
- 15 39. Mizuno T, Kitayama M, Oka H, Tsubouchi M, Takayama C, et al. (2014) The EC  
16 night-time repressor plays a crucial role in modulating circadian clock  
17 transcriptional circuitry by conservatively double-checking both warm-night and  
18 night-time-light signals in a synergistic manner in Arabidopsis thaliana. Plant Cell  
19 Physiol 55: 2139–2151. doi:10.1093/pcp/pcu144.
- 20 40. Nomoto Y, Nomoto Y, Kubozono S, Miyachi M, Yamashino T, et al. (2012) A  
21 circadian clock- and PIF4-mediated double coincidence mechanism is implicated  
22 in the thermosensitive photoperiodic control of plant architectures in Arabidopsis  
23 thaliana. Plant Cell Physiol 53: 1965–1973. doi:10.1093/pcp/pcs141.
- 24 41. Mizuno T, Kitayama M, Takayama C, Yamashino T (2015) Insight into a  
25 Physiological Role for the EC Night-Time Repressor in the Arabidopsis Circadian  
26 Clock. Plant Cell Physiol 56: 1738–1747. doi:10.1093/pcp/pcv094.
- 27 42. Ibañez C, Poeschl Y, Peterson T, Bellstädt J, Denk K, et al. (2015)  
28 Developmental plasticity of Arabidopsis thaliana accessions across an ambient  
29 temperature range. bioRxiv: 017285. doi:10.1101/017285.
- 30 43. Stavang JA, Gallego-Bartolomé J, Gómez MD, Yoshida S, Asami T, et al. (2009)  
31 Hormonal regulation of temperature-induced growth in Arabidopsis. Plant J 60:  
32 589–601. doi:10.1111/j.1365-313X.2009.03983.x.
- 33 44. Sun J, Qi L, Li Y, Zhai Q, Li C (2013) PIF4 and PIF5 transcription factors link blue  
34 light and auxin to regulate the phototropic response in Arabidopsis. Plant Cell 25:  
35 2102–2114. doi:10.1105/tpc.113.112417.



- 1 45. Sawa M, Kay SA (2011) GIGANTEA directly activates Flowering Locus T in  
2 Arabidopsis thaliana. Proc Natl Acad Sci U S A 108: 11698–11703.  
3 doi:10.1073/pnas.1106771108.
- 4 46. Jang K, Gil Lee H, Jung S-J, Paek N-C, Joon Seo P (2015) The E3 Ubiquitin  
5 Ligase COP1 Regulates Thermosensory Flowering by Triggering GI Degradation  
6 in Arabidopsis. Sci Rep 5: 12071. doi:10.1038/srep12071.
- 7 47. Edwards KD, Lynn JR, Gyula P, Nagy F, Millar AJ (2005) Natural allelic variation  
8 in the temperature-compensation mechanisms of the Arabidopsis thaliana  
9 circadian clock. Genetics 170: 387–400. doi:10.1534/genetics.104.035238.
- 10 48. Edwards KD, Guerineau F, Devlin PF, Millar AJ (2015) Low-temperature-specific  
11 effects of PHYTOCHROME C on the circadian clock in Arabidopsis suggest that  
12 PHYC underlies natural variation in biological timing. bioRxiv: 030577.  
13 doi:10.1101/030577.
- 14 49. Lee JH, Yoo SJ, Park SH, Hwang I, Lee JS, et al. (2007) Role of SVP in the  
15 control of flowering time by ambient temperature in Arabidopsis. Genes Dev 21:  
16 397–402. doi:10.1101/gad.1518407.
- 17 50. Duek PD, Fankhauser C (2005) bHLH class transcription factors take centre  
18 stage in phytochrome signalling. Trends Plant Sci 10: 51–54.  
19 doi:10.1016/j.tplants.2004.12.005.
- 20 51. Huq E, Quail PH (2002) PIF4, a phytochrome-interacting bHLH factor, functions  
21 as a negative regulator of phytochrome B signaling in Arabidopsis. EMBO J 21:  
22 2441–2450. doi:10.1093/emboj/21.10.2441.
- 23 52. Luo Q, Lian H-L, He S-B, Li L, Jia K-P, et al. (2014) COP1 and phyB Physically  
24 Interact with PIL1 to Regulate Its Stability and Photomorphogenic Development in  
25 Arabidopsis. Plant Cell 26: 2441–2456. doi:10.1105/tpc.113.121657.
- 26 53. Alonso JM, Stepanova AN, Leisse TJ, Kim CJ, Chen H, et al. (2003) Genome-  
27 wide insertional mutagenesis of Arabidopsis thaliana. Science 301: 653–657.  
28 doi:10.1126/science.1086391.
- 29 54. Kleinboelting N, Huet G, Kloetgen A, Viehoveer P, Weisshaar B (2012) GABI-Kat  
30 SimpleSearch: new features of the Arabidopsis thaliana T-DNA mutant database.  
31 Nucleic Acids Res 40: D1211–D1215. doi:10.1093/nar/gkr1047.
- 32 55. R Core Team (2016) R: A Language and Environment for Statistical Computing.
- 33 56. Pfaffl MW (2001) A new mathematical model for relative quantification in real-time  
34 RT-PCR. Nucleic Acids Res 29: e45.

1

2

1

## 2 **Supporting Information Captions**

3 **Fig. S1. Expression analysis of *PIF4* and *AtHB2* depends on temperature, genetic**  
4 **background, and *ELF3* functionality.** Error bars represent the standard deviation  
5 across two biological replicates. White bars represent 22° expression, red bars 27°  
6 expression for each line. Tissue was collected from 7d seedlings at ZT0.

7

8 **Fig. S2. Regulation of adult thermoresponsive traits by *ELF3* and *FCA* is**  
9 **independent of *PIF4* and modulated by genetic background.** Flowering temperature  
10 response of indicated genotypes under indicated conditions, measured by petiole length  
11 to leaf length ratio at 25 days or rosette leaf number (RLN) at flowering. For each  
12 experiment, n > 10 plants for each genotype in each treatment. Regression analysis of  
13 data in Tables S4 and S5.

14

15 **Fig. S3. Regulation of adult thermoresponsive petiole elongation traits occurs**  
16 **principally through *PIF4*.** Petiole elongation temperature response of indicated  
17 genotypes under indicated conditions, measured by ratio of petiole length to leaf length  
18 at 25d. For each experiment, n > 10 plants for each genotype in each treatment. This  
19 experiment was repeated with similar results. Regression analysis of data in Table S8.

20

21 **Fig. S4. Expression of *FT* in 7d seedlings responds to temperature and *elf3***  
22 **status.** White bars represent 22° expression, red bars 27° expression for each line.

- 1 Tissue was collected from 7d seedlings at ZT0. Error bars indicate SEM across three  
2 biological replicates.  
3
- 4 **Table S1. Regression analysis of hypocotyl elongation temperature response**  
5 **among Col and Ws transgenic lines.**
- 6 **Table S2. Regression analysis of petiole : leaf length ratio and rosette leaf**  
7 **number at flowering temperature response among Col and Ws transgenic lines.**
- 8 **Table S3. Regression analysis of rosette leaf number at flowering and petiole :**  
9 **leaf length ratio temperature responses in *elf3* and *pif4*.**
- 10 **Table S4. Regression analysis of rosette leaf number at flowering temperature**  
11 **response in Ws and *elf3-4*.**
- 12 **Table S5. Regression analysis of petiole : leaf length ratio temperature response**  
13 **in Col and *fca* mutants.**
- 14 **Table S6. Regression analysis of rosette leaf number at flowering temperature**  
15 **response in *elf3 pif4* double mutants.**
- 16 **Table S7. Regression analysis of rosette leaf number at flowering temperature**  
17 **response in *pif4 pif5* double mutants.**
- 18 **Table S8. Regression analysis of the petiole elongation temperature response in**  
19 ***pif4 pif5* double mutants.**
- 20 **Table S9. Regression analysis of rosette leaf number at flowering and petiole :**  
21 **leaf length ratio temperature responses in flowering pathway mutants.**
- 22 **Table S10. Primers used in this study.**
- 23 **Table S11. Mutant lines used in this study.**
